# Supplementary material for: CD47 Expression in Natural Killer Cells Regulates Homeostasis and Modulates Immune Response to Lymphocytic Choriomeningitis Virus
Source: Front Immunol. 2018 Dec 20;9:2985. doi: 10.3389/fimmu.2018.02985 (PMC6320676; doi:10.3389/fimmu.2018.02985)
Supplement: Supplementary file 2 [file Table_2.XLS]

## Sheet: Sheet1
Uninfected						Uninfected						Uninfected						Uninfected						Uninfected						Uninfected						Uninfected						Uninfected						Infected
Naïve						Early Effector						Sustained Effector						Late Effector						Memory						Interferon						Cell Cycle & Proliferation						Apoptosis & Cell Death						Naïve
PROBE	RANK IN GENE LIST	RANK METRIC SCORE	RUNNING ES	CORE ENRICHMENT		PROBE	RANK IN GENE LIST	RANK METRIC SCORE	RUNNING ES	CORE ENRICHMENT		PROBE	RANK IN GENE LIST	RANK METRIC SCORE	RUNNING ES	CORE ENRICHMENT		PROBE	RANK IN GENE LIST	RANK METRIC SCORE	RUNNING ES	CORE ENRICHMENT		PROBE	RANK IN GENE LIST	RANK METRIC SCORE	RUNNING ES	CORE ENRICHMENT		PROBE	RANK IN GENE LIST	RANK METRIC SCORE	RUNNING ES	CORE ENRICHMENT		PROBE	RANK IN GENE LIST	RANK METRIC SCORE	RUNNING ES	CORE ENRICHMENT		PROBE	RANK IN GENE LIST	RANK METRIC SCORE	RUNNING ES	CORE ENRICHMENT		PROBE	RANK IN GENE LIST
Ptprj	57	5.64307	0.0338402	No		Il2ra	8	8.32582	0.0201172	Yes		Dtl	54	5.71479	0.0936294	Yes		Sik1	241	3.78393	0.047311	Yes		Hmox1	45	6.08586	0.0739533	No		Irf5	193	4.04158	0.0598691	Yes		Aurkb	86	5.01713	0.0618906	Yes		Dapk1	125	4.55879	0.0682119	Yes		Vcl	54
Pglyrp1	486	3.03689	0.0418817	No		Scarb1	31	6.67184	0.0358351	Yes		Aurkb	86	5.01713	0.176247	Yes		Mt1	846	2.50167	0.0672307	Yes		Cetn4	296	3.57539	0.111688	No		Ifngr2	276	3.63889	0.116117	Yes		Ccnb2	519	2.98519	0.0889845	Yes		Bcl2a1a	450	3.11653	0.10875	Yes		Myo1c	237
Capg	766	2.60209	0.0510172	No		Hk2	101	4.81292	0.0458004	Yes		E2f8	252	3.7636	0.234605	Yes		Tspan31	905	2.43613	0.100172	Yes		Dusp14	704	2.69903	0.134596	No		Lifr	366	3.32806	0.167202	Yes		Dst	549	2.93972	0.125795	Yes		Birc3	1293	2.07346	0.119716	Yes		Slc9a7	316
Myadm	906	2.43117	0.062667	No		Uhrf1	119	4.59194	0.0565704	Yes		Foxm1	426	3.15427	0.282629	Yes		Ngfr	1144	2.18239	0.12493	Yes		4930444G20Rik	848	2.50029	0.161797	No		Ebi3	439	3.13343	0.215601	Yes		Mki67	594	2.86062	0.161212	Yes		Birc5	1403	1.9942	0.148167	Yes		Ccl3	1300
Hmgb2	1708	1.81211	0.0534996	No		Snx9	120	4.58426	0.0677609	Yes		Ccnb2	519	2.98519	0.329909	Yes		Palm	1352	2.0269	0.148282	Yes		Apold1	851	2.49854	0.192579	No		Ifna2	654	2.77195	0.254578	Yes		Ccnf	673	2.73699	0.194181	Yes		Traf3	1540	1.908	0.174578	Yes		Rnf216	1716
Tigit	1860	1.73552	0.0604908	No		Nefh	139	4.43856	0.0781306	Yes		Mki67	594	2.86062	0.375577	Yes		Cdc20	1442	1.96185	0.17373	Yes		2610020H08Rik	1572	1.88473	0.19744	No		Ifi27l2a	678	2.73179	0.297789	Yes		Cdc6	732	2.64792	0.226523	Yes		Trp63	1547	1.90308	0.204233	Yes		Pglyrp1	2134
Cd44	2049	1.65284	0.0660177	No		Sdc3	182	4.11327	0.0870858	Yes		Cdc6	732	2.64792	0.416102	Yes		Hmgb2	1708	1.81211	0.192566	Yes		Pmaip1	2110	1.62992	0.203833	No		Ifi44	735	2.64315	0.338736	Yes		Myb	1093	2.23736	0.245904	Yes		Traf1	2689	1.43409	0.197547	Yes		St3gal6	3128
Adap1	2154	1.61509	0.0734586	No		Litaf	214	3.90993	0.0958291	Yes		Hmgn2	1012	2.32305	0.447601	Yes		Ube2c	1877	1.7307	0.212729	Yes		Kif7	2630	1.45331	0.208507	No		Ifitm2	767	2.60116	0.379648	Yes		Cks1b	1236	2.1134	0.269272	Yes		Casp4	2911	1.37063	0.213369	Yes		Ehbp1l1	4066
Dennd5a	2534	1.48033	0.0730175	No		Tgm2	245	3.77499	0.104269	Yes		E2f7	1417	1.9802	0.470209	Yes		2900026A02Rik	1882	1.72767	0.237039	Yes		Dnajb9	3118	1.31471	0.212287	No		Ifnab	828	2.53122	0.418698	Yes		Nek2	1257	2.09834	0.295565	Yes		Anxa5	2912	1.37038	0.234834	Yes		Cd44	4349
Stk39	3285	1.27322	0.0617846	No		Mcm10	294	3.5789	0.111764	Yes		Ncapd2	1613	1.86296	0.496203	Yes		Cbfa2t3	2216	1.59197	0.251027	Yes		Krt8	3803	1.15075	0.20901	No		Ifna4	930	2.40513	0.45468	Yes		Birc5	1403	1.9942	0.317333	Yes		Bcl2l10	3160	1.30259	0.248927	Yes		Itgam	4933
Syne2	4286	1.05865	0.0428104	No		Pecam1	340	3.42955	0.118973	Yes		Grn	1623	1.85739	0.526853	Yes		Olfr566	2301	1.55752	0.270889	Yes		Mdfic	4330	1.04797	0.208503	No		Il6ra	1198	2.14287	0.482218	Yes		Cdc20	1442	1.96185	0.341423	Yes		Fas	3324	1.26429	0.264565	Yes		Eea1	5542
Mdfic	4330	1.04797	0.0482651	No		Taf1d	389	3.25946	0.125689	Yes		Ccna2	1685	1.82598	0.555652	Yes		2310034G01Rik	2458	1.50146	0.28812	Yes		Gm12504	4951	0.943246	0.204301	No		Ifnlr1	2131	1.624	0.484454	Yes		Trp63	1547	1.90308	0.363075	Yes		Nfkb1	3821	1.14755	0.269868	Yes		Ap3s1	5549
Acot7	4893	0.951684	0.039833	No		Hist1h3f	394	3.25249	0.133525	Yes		Kif23	1979	1.6806	0.576113	Yes		4931440P22Rik	2732	1.41966	0.301206	Yes		Rpl17	5130	0.917493	0.211075	No		Osmr	2407	1.52158	0.501826	Yes		Cdk1	1640	1.85194	0.38438	Yes		Casp12	4312	1.05176	0.273824	Yes		Kif13b	6160
Nqo2	5485	0.871916	0.0301597	No		2810417H13Rik	449	3.118	0.139741	Yes		Cdca2	2069	1.64458	0.601182	Yes		Myo1e	2734	1.41919	0.321234	Yes		Fos	5151	0.914821	0.221853	No		Il15	2916	1.36921	0.510806	Yes		Ccna2	1685	1.82598	0.406581	Yes		Cd70	5038	0.929956	0.269869	Yes		Syne2	6414
Fam129a	6052	0.801278	0.0206844	No		Tpst1	493	3.02588	0.146016	Yes		E2f2	2969	1.35475	0.600758	Yes		A530032D15Rik	3068	1.32736	0.331483	Yes		Amotl1	6192	0.784678	0.204963	No		Il12b	3141	1.30877	0.526068	Yes		Skp2	2343	1.54266	0.409499	Yes		Ltbr	5146	0.915281	0.281472	Yes		Itga4	6936
L1cam	6282	0.77615	0.0196779	No		Top2a	711	2.68933	0.146972	Yes		Kif11	3041	1.33436	0.621129	Yes		Dnm1	3467	1.22808	0.338669	Yes		Arx	7054	0.69516	0.191541	No		Il21	3341	1.25955	0.54118	Yes		Mcm3	2429	1.51218	0.426644	Yes		Bad	5712	0.842371	0.280232	Yes		Tbx21	7216
Ptms	7681	0.638063	-0.0121146	No		Fgr	730	2.65224	0.152981	Yes		Ncaph	3713	1.17177	0.623482	Yes		Rhbdf2	3759	1.16187	0.347653	Yes		Mdga1	8161	0.592876	0.170597	No		Csf3r	3354	1.25709	0.561029	Yes		Cdkn2a	2526	1.48249	0.443128	Yes		Tnf	6059	0.800212	0.283927	Yes		Ahnak	7287
Serpinb6b	8319	0.580057	-0.0247911	No		Hist1h3a	745	2.62964	0.159039	Yes		Stom	5542	0.864591	0.591196	No		1700017B05Rik	5117	0.919006	0.325975	No		Thoc1	8538	0.563126	0.167939	No		Irf6	3824	1.1472	0.567444	Yes		Ccnd1	2640	1.44877	0.458747	Yes		Cd40	6262	0.777998	0.290952	Yes		Ppp1r12a	7360
Stmn1	9483	0.50029	-0.0514302	No		Ifitm3	761	2.60579	0.165012	Yes		Jak3	6531	0.74685	0.578393	No		Ckm	6877	0.71303	0.291117	No		Ly6c1	9284	0.512415	0.155226	No		Ifnz	4230	1.06887	0.574239	Yes		Ccnb1	2897	1.37328	0.469747	Yes		Tnfrsf11b	6380	0.764655	0.29994	Yes		Stk32c	7624
Ctla2a	9622	0.490821	-0.0518923	No		Cit	796	2.57405	0.170417	Yes		Rnf213	7029	0.697291	0.5773	No		Ttyh2	6930	0.707444	0.299784	No		Hmgb1	9614	0.49122	0.152882	No		Il7r	4268	1.06253	0.590329	Yes		E2f2	2969	1.35475	0.485239	Yes		Casp14	6582	0.741963	0.306427	Yes		Zeb2	7655
Casp1	10674	0.422263	-0.0761527	No		Hist1h3g	860	2.48389	0.174852	Yes		Itpr1	7342	0.66778	0.580438	No		Rangrf	7048	0.695697	0.306626	No		Ahsa2	10226	0.448834	0.142808	No		Il13ra1	4401	1.0384	0.603607	Yes		Cdk6	3090	1.32324	0.499075	Yes		Igf1r	6902	0.710674	0.309409	Yes		Cited2	7659
Wee1	10937	0.406597	-0.0803156	No		Usp2	880	2.46186	0.18037	Yes		Kif18b	7747	0.631104	0.580618	No		Plekho1	7471	0.656263	0.305119	No		Casp1	10674	0.422263	0.136598	No		Il6st	5293	0.897147	0.595236	Yes		Cdk5rap1	3183	1.29718	0.513294	Yes		Tnfrsf10b	7167	0.683453	0.31337	Yes		Ccnd2	7943
Bspry	11384	0.381262	-0.0893466	No		Hmgn2	1012	2.32305	0.182655	Yes		Prkcz	7808	0.624265	0.589464	No		Ptms	7681	0.638063	0.308796	No		Zfp599	11182	0.392505	0.128487	No		Ifitm1	5611	0.855174	0.600852	Yes		Nusap1	3654	1.18407	0.51641	Yes		Tnfsf10	7962	0.611928	0.30267	Yes		Hopx	9237
Plp2	11933	0.352435	-0.101169	No		Rsad2	1015	2.32191	0.188271	Yes		Slc43a3	8935	0.535867	0.569632	No		Ptprs	8238	0.587462	0.302894	No		Rab4a	12623	0.318616	0.0956236	No		Il4ra	6304	0.773174	0.595576	Yes		Rb1	3737	1.16675	0.529219	Yes		Prdx2	8085	0.601095	0.308969	Yes		Prr5l	9847
Ksr1	12237	0.336178	-0.106822	No		Fanca	1047	2.28894	0.193057	Yes		Eif4g3	9074	0.526314	0.574859	No		Rnf43	8536	0.563426	0.303269	No		Clock	12752	0.312682	0.0962117	No		Csf2	6845	0.715892	0.593263	Yes		Prc1	3974	1.11892	0.537481	Yes		Naip1	8242	0.58732	0.314183	Yes		Smad3	10000
Ap3s1	12295	0.333914	-0.106192	No		Dusp16	1077	2.25651	0.197816	Yes		Thy1	10521	0.431217	0.545119	No		Grm2	9239	0.515514	0.292621	No		Efemp2	13411	0.285258	0.0829188	No		Prlr	6870	0.713336	0.604087	Yes		Rad51	4763	0.976007	0.529814	Yes		Bcl10	10078	0.459603	0.274504	No		Gramd1b	10372
Prr5l	12516	0.32296	-0.109803	No		Hspe1	1122	2.21008	0.202074	Yes		Tyms	11088	0.397893	0.537286	No		Hip1	9681	0.487293	0.288241	No		Fam111a	14020	0.259243	0.0705824	No		Ifit1	6916	0.709209	0.614309	Yes		Mad2l1	4855	0.959108	0.53974	Yes		Bcl2l11	10513	0.431568	0.270176	No		Plp2	11072
Dennd4a	12969	0.303785	-0.119472	No		Gapdh	1175	2.1618	0.206007	Yes		Eif3c	14432	0.244127	0.456014	No		Tmem221	9881	0.473361	0.289846	No		Gm15542	16729	0.161658	0.00338276	No		Il20ra	7482	0.655253	0.610386	Yes		Brca1	5414	0.882298	0.536752	Yes		Gadd45a	10531	0.430784	0.276489	No		Mapre2	11415
Whsc1	13546	0.278732	-0.132472	No		Cks1b	1236	2.1134	0.209615	Yes		Nlrc5	14695	0.235276	0.453238	No		Avpr2	10061	0.460422	0.291779	No		Apoa2	17761	0.129384	-0.0213646	No		Ifih1	7570	0.647409	0.618544	Yes		Nbn	5477	0.872997	0.54632	Yes		Casp1	10674	0.422263	0.279475	No		Nbeal2	11429
Myo1c	13839	0.266981	-0.138276	No		Asf1b	1241	2.10932	0.214661	Yes		Epn1	16097	0.183991	0.420536	No		Klf11	10547	0.43018	0.285469	No		Pitx1	19640	0.0841815	-0.0683123	No		Ifna11	8090	0.600538	0.614918	No		E2f1	5964	0.811329	0.544265	No		Il10	13206	0.293229	0.21941	No		L1cam	11464
Aplp2	16304	0.176174	-0.200244	No		Tpx2	1245	2.10536	0.219723	Yes		Dock6	16730	0.161642	0.407092	No		Pltp	11012	0.4022	0.279299	No		Top1	19719	0.0815182	-0.0692993	No		Ifna9	8365	0.57746	0.617179	No		Pkd1	7018	0.698761	0.526285	No		Cideb	13698	0.273	0.211142	No		Prex1	11597
F2rl2	16861	0.156515	-0.213496	No		Bst2	1358	2.02559	0.221773	Yes		Grb7	18549	0.106178	0.362452	No		Arap3	11419	0.379664	0.274292	No		Pisd-ps2	20058	0.070915	-0.0770607	No		Ctf2	8678	0.552043	0.618062	No		Brca2	7706	0.635912	0.516854	No		Abl1	16660	0.164644	0.138077	No		Dock5	11915
Ccl3	17230	0.146291	-0.222001	No		Amica1	1457	1.95109	0.224002	Yes		Troap	18565	0.105918	0.36383	No		St3gal3	12875	0.307844	0.241475	No		Ccdc85c	20533	0.0589435	-0.0884449	No		Il9r	9220	0.517009	0.612535	No		Cdc25a	7712	0.634715	0.524834	No		Bax	17708	0.130605	0.113376	No		2018-09-11	12053
Il10ra	17973	0.123606	-0.24022	No		Odc1	1528	1.91195	0.22686	Yes		Psme2	22403	0.0201753	0.266225	No		Ggnbp1	13121	0.297233	0.239416	No		Ccdc137	21169	0.0432969	-0.104136	No		Mpl	9389	0.506552	0.616366	No		Cdc7	8040	0.60565	0.524215	No		Card10	17939	0.124504	0.10945	No		Dennd5a	12193
Zcchc18	18430	0.109711	-0.251206	No		Snrpa	1532	1.91103	0.231448	Yes		Fyb	27373	-0.0493338	0.140211	No		Atxn1	13603	0.276945	0.231042	No		Cog3	21795	0.0393592	-0.11962	No		Irf4	10812	0.413571	0.586683	No		Cdk2	8277	0.584232	0.525648	No		Traf2	18225	0.116368	0.103992	No		Nqo2	12404
Cited2	19791	0.0790165	-0.285523	No		Cish	1545	1.90525	0.235789	Yes		Traf4	27992	-0.0705315	0.125609	No		Kifc1	13843	0.266799	0.228707	No		Calm1	21872	0.0369555	-0.121106	No		Cxcl10	11054	0.400157	0.586944	No		E2f3	8552	0.562126	0.525827	No		Nol3	19035	0.0930255	0.0847817	No		Acot7	12748
Plscr1	20791	0.0520695	-0.310768	No		Ckb	1619	1.8589	0.238439	Yes		Glcci1	31082	-0.18676	0.0498665	No		Depdc1b	16442	0.172401	0.164778	No		2410080I02Rik	23791	0.000289005	-0.170111	No		Epor	12185	0.339205	0.563525	No		Cks2	9431	0.504058	0.509831	No		Cd40lg	19094	0.0914768	0.0847328	No		Chsy1	13094
Hip1r	21192	0.0427119	-0.320739	No		Nr4a1	1817	1.76352	0.237653	Yes		Scaf1	31292	-0.196589	0.0478	No		Racgap1	17083	0.149246	0.150538	No		Ccnl1	26919	-0.0358126	-0.24957	No		Ghr	12233	0.336358	0.567717	No		Stmn1	9483	0.50029	0.514919	No		Fadd	20064	0.070847	0.0610878	No		Aplp2	13402
Prr13	23063	0.00578622	-0.368568	No		Rgs16	1890	1.72348	0.239999	Yes		Mbd6	32626	-0.270143	0.018266	No		Gna15	18090	0.120049	0.126536	No		Gm10830	27033	-0.0391897	-0.251974	No		Csf3	13496	0.281137	0.539996	No		Smc1a	9711	0.485357	0.515318	No		Nme5	22125	0.0287599	0.00891206	No		Unc119	13474
Prr5	25770	-0.0129655	-0.437751	No		Slc29a1	1936	1.69774	0.24298	Yes		Msl1	32649	-0.271901	0.0222248	No		Gm10825	19558	0.0868955	0.0902901	No		Cnih2	28289	-0.0744158	-0.283123	No		Il21r	14830	0.229665	0.509637	No		Clk4	10141	0.456097	0.510182	No		Polb	22479	0.0175353	0.000168737	No		Fam129b	13992
Entpd1	25919	-0.0175305	-0.441429	No		Tcf19	1972	1.68364	0.246185	Yes		Zfhx2	32682	-0.273815	0.0259601	No		Fbrs	20275	0.0655038	0.0729257	No		Cdkn2b	29217	-0.109662	-0.305457	No		Ifna14	15287	0.211884	0.501389	No		Gadd45a	10531	0.430784	0.505746	No		Cidea	24271	0.000288604	-0.0455809	No		Cobll1	14044
Ccdc50	26014	-0.0206743	-0.443706	No		Rad54l	1986	1.67906	0.249948	Yes		Trerf1	33624	-0.340575	0.00760295	No		St6galnac6	20656	0.0553833	0.0640012	No		Fcho2	29603	-0.123209	-0.313774	No		Irf7	17298	0.143983	0.452367	No		Chek2	10539	0.4306	0.511067	No		Aifm1	25741	-0.0122268	-0.0829175	No		Il18r1	14220
Eea1	26015	-0.0206832	-0.443577	No		Pola1	2021	1.66302	0.253129	Yes		Chd7	34619	-0.426391	-0.0106804	No		Nacad	21114	0.0447018	0.0529589	No		Gm7125	29657	-0.124904	-0.313586	No		Ifna12	17953	0.124162	0.437656	No		Pmp22	10715	0.419841	0.511958	No		Bcl2	26440	-0.0325193	-0.10024	No		Ak3	15444
Ifng	27988	-0.0703501	-0.493613	No		Isg20	2086	1.63706	0.255471	Yes		Dgkz	34632	-0.428343	-0.00386552	No		Cnnm2	22674	0.0131346	0.0133203	No		Chadl	30139	-0.143819	-0.324102	No		Lepr	18877	0.097109	0.415642	No		Tfdp1	10856	0.411307	0.513635	No		Trp73	27265	-0.045491	-0.120578	No		Lrrk1	16005
S100a11	28329	-0.0759474	-0.501841	No		Ncapg2	2087	1.63615	0.259465	Yes		Arhgef1	35704	-0.551655	-0.0220318	No		Hamp2	23578	0.000318081	-0.00974214	No		Far1	30889	-0.178176	-0.341042	No		Ifnk	20648	0.055837	0.371335	No		Wee1	10937	0.406597	0.516785	No		Bcl2l2	27629	-0.0578687	-0.128945	No		Ptms	16138
S100a10	28514	-0.0830046	-0.506031	No		Adap1	2154	1.61509	0.261702	Yes		Mark2	35980	-0.589758	-0.0192465	No		Mlxip	25679	-0.00957861	-0.0632507	No		Hmga1	30896	-0.178462	-0.338993	No		Il6	20864	0.0499433	0.366646	No		Cdkn3	11668	0.365721	0.502804	No		Apaf1	27829	-0.0636942	-0.133031	No		Katnb1	16497
Casp3	28914	-0.0985412	-0.515628	No		Cdca7	2229	1.58743	0.263664	Yes		Gopc	36029	-0.597232	-0.0105428	No		Trp73	27265	-0.045491	-0.103096	No		Ptprv	31339	-0.198813	-0.347833	No		Ifne	22051	0.0312192	0.336858	No		Ppm1d	12889	0.307476	0.475558	No		Dad1	27946	-0.0681765	-0.134926	No		Ifng	16752
Cyfip1	28933	-0.0993424	-0.515467	No		C1qtnf6	2293	1.55955	0.265843	Yes		Map3k11	37675	-0.959603	-0.0365785	No		Jarid2	28694	-0.0895726	-0.138309	No		Nktr	31558	-0.210577	-0.350805	No		Il12rb1	22280	0.0237032	0.331416	No		Atr	13185	0.294473	0.471782	No		Atf5	28247	-0.0733459	-0.141442	No		Vim	20467
Atp2b1	29418	-0.116347	-0.527128	No		Hist2h3b	2316	1.55203	0.269063	Yes		Cyfip2	37867	-1.03109	-0.024312	No		A630072L19Rik	30751	-0.17227	-0.188394	No		4932438A13Rik	31916	-0.230928	-0.357077	No		Ifngr1	22526	0.0163033	0.325421	No		Mcm4	14060	0.257505	0.452739	No		Bcl2l1	28771	-0.092937	-0.153347	No		Cmklr1	20590
Endod1	29700	-0.126574	-0.533529	No		Parp12	2325	1.54941	0.272638	Yes		Runx3	38733	-1.59572	-0.0198626	No		Klrg1	31283	-0.196252	-0.199186	No		Sacs	32130	-0.241906	-0.359534	No		Il2rg	22708	0.0120833	0.320992	No		Gas5	14592	0.23906	0.442224	No		Casp3	28914	-0.0985412	-0.155431	No		Klf10	20762
Ahnak	29823	-0.130944	-0.535832	No		Mcm3	2429	1.51218	0.273667	Yes		B3gnt7	38950	-1.95169	0.00707059	No		Setd1b	31544	-0.209907	-0.202861	No		Rbm25	32140	-0.242712	-0.356769	No		Il13	23300	0.000458821	0.305907	No		Gpr132	14691	0.235408	0.442727	No		Bnip3	29268	-0.111191	-0.162707	No		Slc25a24	21240
N4bp1	30835	-0.176104	-0.560609	No		Ccnyl1	2539	1.4784	0.274459	Yes								Mospd3	31960	-0.233522	-0.210163	No		Mrpl20	32531	-0.264827	-0.363466	No		Il22ra2	23497	0.000342492	0.300907	No		Chek1	15472	0.205208	0.425418	No		Diablo	29278	-0.111822	-0.161186	No		Ppm1j	21273
Tnfrsf1b	31140	-0.189703	-0.567203	No		Cenpn	2600	1.46158	0.276476	Yes								Gm8956	32275	-0.250561	-0.214643	No		Zufsp	32727	-0.276918	-0.365032	No		Irf8	25587	-0.00599455	0.247655	No		Terf1	16176	0.18095	0.409766	No		Bag3	29771	-0.129193	-0.171731	No		Atp2b1	21332
Rad21	31148	-0.190002	-0.566194	No		Piga	2618	1.45711	0.279593	Yes								Inpp4a	32403	-0.257399	-0.21425	No		Zfp97	32982	-0.295486	-0.367875	No		Mx1	25646	-0.00813856	0.246304	No		Abl1	16660	0.164644	0.399528	No		Dffa	30202	-0.146735	-0.180418	No		Ctsd	21367
Klrg1	31283	-0.196252	-0.568396	No		Lmnb1	2638	1.44906	0.28264	Yes								Dennd1c	33307	-0.317283	-0.232834	No		Klra6	32990	-0.295818	-0.364404	No		Osm	27486	-0.0531423	0.200193	No		Cdkn1a	18703	0.101223	0.348644	No		Bak1	30743	-0.171878	-0.191521	No		Cyfip1	21636
Ggh	31379	-0.200928	-0.569571	No		Lag3	2662	1.44087	0.285562	Yes								Pdcd11	33474	-0.329706	-0.232416	No		Hspa4l	33422	-0.326294	-0.37139	No		Ifnb1	27678	-0.0588331	0.196258	No		Rbl2	18747	0.100232	0.348826	No		Mcl1	31606	-0.212709	-0.210211	No		Entpd1	21637
Vim	31454	-0.20485	-0.570184	No		Jun	2664	1.44076	0.289054	Yes								Tet3	33614	-0.340023	-0.231162	No		Gsc2	33447	-0.327519	-0.367961	No		F3	27864	-0.0652587	0.19258	No		Msh2	18925	0.0958059	0.345527	No		Lhx4	31734	-0.219874	-0.210011	No		Zcchc18	21704
Adora2a	31716	-0.218681	-0.575496	No		Oas1a	2667	1.43982	0.292517	Yes								Haao	33678	-0.344765	-0.2279	No		Dnajc1	33451	-0.327701	-0.363994	No		Ifng	27988	-0.0703501	0.190567	No		E2f4	20125	0.0692609	0.315775	No		Trp53	32078	-0.239516	-0.215022	No		Pogk	21828
Gzmb	31889	-0.228647	-0.578469	No		Nap1l1	2696	1.43163	0.295288	Yes								Prss27	33923	-0.363619	-0.228995	No		Gcc2	33953	-0.366303	-0.372275	No		Il4	28293	-0.0745036	0.183998	No		Cdc25c	20248	0.0661891	0.313503	No		Casp2	32093	-0.240483	-0.211613	No		Ksr1	21850
Cxcr3	32085	-0.239901	-0.581959	No		Rrm2	2786	1.40441	0.296416	Yes								Klf13	34367	-0.401038	-0.234644	No		Gvin1	34093	-0.37641	-0.371182	No		Crlf2	29549	-0.121552	0.153897	No		Skp1a	21828	0.0383853	0.273647	No		Dffb	32480	-0.262105	-0.217369	No		Nptn	21890
Id2	32338	-0.254323	-0.586819	No		Hdlbp	2820	1.3958	0.29897	Yes								Chd7	34619	-0.426391	-0.235031	No		Rsrc1	34331	-0.398377	-0.372321	Yes		Ifnar1	30207	-0.147025	0.139476	No		Aurka	21935	0.0347412	0.271382	No		Mapk1	33029	-0.298062	-0.2267	No		Myo1f	22704
Vcl	32431	-0.259172	-0.587553	No		Casp4	2911	1.37063	0.29999	Yes								1700066M21Rik	35534	-0.526613	-0.250938	No		Sltm	34517	-0.41594	-0.371915	Yes		Il10rb	32466	-0.261265	0.0860012	No		Hus1	22310	0.0229074	0.262118	No		Bag1	33046	-0.299249	-0.222421	No		Klrc2	23177
Il2rb	32615	-0.269751	-0.590549	No		Gm6560	3046	1.33223	0.299778	Yes								Ntng2	35761	-0.559163	-0.24881	No		A830080D01Rik	34558	-0.420344	-0.36775	Yes		Il2rb	32615	-0.269751	0.0865465	No		Slfn1	23058	0.00597179	0.243107	No		Birc2	33186	-0.308242	-0.221144	No		Cx3cr1	23302
Katnb1	32768	-0.280397	-0.592686	No		Cdk6	3090	1.32324	0.301897	Yes								Dock5	36285	-0.637042	-0.253168	No		Chd7	34619	-0.426391	-0.364021	Yes		Ifit2	33324	-0.318721	0.0735759	No		Mcm2	25886	-0.0163261	0.17108	No		Bnip2	33211	-0.309808	-0.216905	No		S100a10	23646
Itgb1	32807	-0.282875	-0.591889	No		Pmepa1	3217	1.28979	0.301789	Yes								Maml2	36558	-0.688629	-0.250386	No		Dgkz	34632	-0.428343	-0.359042	Yes		Isg15	33770	-0.351416	0.0678459	No		Ran	26410	-0.0318952	0.158124	No		Api5	33280	-0.314913	-0.213709	No		Car5b	23867
Ccr2	32921	-0.290674	-0.592963	No		Mlkl	3277	1.27554	0.303378	Yes								Rbm38	36953	-0.771214	-0.249553	No		Atrx	34682	-0.432707	-0.354954	Yes		Il7	33889	-0.361414	0.0706269	No		Bcl2	26440	-0.0325193	0.157799	No		Tnfrsf1a	34541	-0.418525	-0.239343	No		Atp2b4	24497
Fbxw8	33216	-0.310201	-0.598548	No		Stk39	3285	1.27322	0.306305	Yes								Foxk1	36972	-0.776039	-0.239048	No		Armc7	34686	-0.432944	-0.349688	Yes		Irf1	35208	-0.486685	0.0447713	No		Ccna1	26911	-0.03538	0.146241	No		Ripk1	35574	-0.532445	-0.257367	No		Lgals1	24662
Ehbp1l1	33437	-0.326996	-0.602134	No		Polq	3487	1.22328	0.304096	Yes								Os9	37225	-0.839246	-0.233626	No		B230307C23Rik	34840	-0.44881	-0.348059	Yes		Irf2	35649	-0.542592	0.0422341	No		Mre11a	27270	-0.0455644	0.137676	No		Pycard	35591	-0.535848	-0.249383	No		Stx11	24795
Ctsd	33726	-0.348186	-0.607328	No		Cd22	3596	1.19564	0.304223	Yes								Slain2	37335	-0.864966	-0.224189	No		Lrrfip1	34974	-0.46177	-0.345759	Yes		Irf2bp1	38641	-1.49067	-0.0102492	No		Ccnc	28729	-0.0908811	0.101582	No		Naip2	36051	-0.600867	-0.251697	No		Soat2	25861
Cx3cr1	33748	-0.349947	-0.605676	No		Cdca3	3644	1.18692	0.305905	Yes								Slc9a3r1	37645	-0.952262	-0.218626	No		Fam178a	35547	-0.528635	-0.353851	Yes		Lif	38710	-1.57106	0.0132028	No		Casp3	28914	-0.0985412	0.098139	No		Bnip3l	36553	-0.688096	-0.253718	No		F2rl2	26017
Myo1f	33844	-0.357975	-0.605869	No		Rnf19b	3789	1.15322	0.304999	Yes								Pik3cb	38168	-1.16604	-0.215485	No		Klf12	36036	-0.598482	-0.358935	Yes								Cdkn2b	29217	-0.109662	0.0918231	No		Casp8	36557	-0.68858	-0.24301	No		Itgax	26079
Klrc1	34074	-0.374628	-0.609387	No		Apobec3	3998	1.11328	0.30234	Yes								Ptp4a3	38246	-1.20382	-0.200441	No		Ppig	36566	-0.689393	-0.363944	Yes								Notch2	30411	-0.156128	0.0633341	No		Nod1	36608	-0.696782	-0.233373	No		Endod1	26208
Itgb3bp	34095	-0.3765	-0.607544	No		Atad5	4050	1.1028	0.303714	Yes								Slc36a1	38346	-1.27634	-0.184936	No		Tpr	37108	-0.812723	-0.367738	Yes								Rad21	31148	-0.190002	0.0469549	No		Casp7	36733	-0.724888	-0.225187	No		Casp7	26223
Itgax	34105	-0.377086	-0.605415	No		Ptma	4082	1.09601	0.305588	Yes								Mnt	38451	-1.33596	-0.168715	No		Klra10	37470	-0.90302	-0.365819	Yes								Atm	31211	-0.19244	0.0478289	No		Casp9	36976	-0.776799	-0.219202	No		Klrg1	26400
St3gal6	34229	-0.38905	-0.60613	No		Canx	4186	1.07827	0.305558	Yes								Cercam	38564	-1.42225	-0.15148	No		Zfp182	37481	-0.905748	-0.354897	Yes								Cdk4	31978	-0.234336	0.0312495	No		Xiap	37183	-0.829677	-0.211469	No		Itgal	26817
Slamf7	34430	-0.406499	-0.608706	No		Xcl1	4398	1.039	0.302641	Yes								Fry	38565	-1.42283	-0.131375	No		Cep57	37519	-0.916366	-0.344533	Yes								Trp53	32078	-0.239516	0.0317794	No		Bok	37363	-0.87306	-0.202367	No		Capn2	26853
Gramd1b	34539	-0.418221	-0.608855	No		Asna1	4466	1.02483	0.303411	Yes								Atxn7l1	38681	-1.53778	-0.112584	No		Gm4759	37813	-1.0127	-0.339523	Yes								Clk2	32592	-0.268354	0.0220991	No		Cflar	37571	-0.93126	-0.193069	No		Fbxw8	26868
2018-09-11	34592	-0.423994	-0.607533	No		Pa2g4	4491	1.02027	0.305281	Yes								Mef2d	38702	-1.56268	-0.0910136	No		Gm8995	37871	-1.03232	-0.32824	Yes								Stag1	32600	-0.268692	0.0253525	No		Cradd	37691	-0.964713	-0.180998	No		N4bp1	27322
Itgal	34652	-0.430171	-0.606353	No		Pdia6	4508	1.01651	0.307349	Yes								Zmiz1	38749	-1.61408	-0.0693816	No		Zfp871	37873	-1.03258	-0.315523	Yes								Itgb1	32807	-0.282875	0.0237022	No		Tnfsf12	37837	-1.01951	-0.168734	No		Reep5	27379
Slc9a7	34922	-0.455867	-0.610387	No		Plk1	4540	1.01012	0.309014	Yes								Zdhhc20	39093	-2.38631	-0.0444247	No		4930522L14Rik	38098	-1.12964	-0.307306	Yes								Cdkn1b	34184	-0.384745	-0.00654255	No		Casp6	38267	-1.22101	-0.160568	No		Raph1	27560
Ttc39c	34948	-0.459169	-0.608154	No		Ipo9	4552	1.00858	0.311191	Yes								Fam117a	39187	-3.38443	0.00102191	No		Arih2	38125	-1.14178	-0.29388	Yes								Rad17	34223	-0.388276	-0.00255374	No		Bid	38622	-1.47612	-0.146491	No		Efhd2	27944
Bhlhe40	35115	-0.476599	-0.609422	No		Zranb3	4581	1.00416	0.312919	Yes														Cdc20b	38186	-1.17335	-0.280933	Yes								Ccne1	35333	-0.502849	-0.0244675	No		Akt1	39010	-2.08726	-0.123685	No		Ttc39b	27988
Ppp1r12a	35161	-0.480811	-0.607566	No		Hsp90ab1	4601	1.00101	0.314871	Yes														Cdv3	38572	-1.42952	-0.27313	Yes								Ddit3	35381	-0.508936	-0.0191674	No		Trp53bp2	39054	-2.21328	-0.0901161	No		Plscr1	28034
Lgals1	35778	-0.560906	-0.619825	No		Timeless	4715	0.982472	0.314349	Yes														Hes1	38665	-1.52222	-0.256695	Yes								Tsg101	35435	-0.515312	-0.0139391	No		Fasl	39220	-6.03392	0.000179078	No		Tmem163	28121
Lrrk1	36024	-0.596886	-0.622362	Yes		Fndc3a	4735	0.980156	0.31625	Yes														Zfp292	38712	-1.57321	-0.238457	Yes								Ccnd3	35809	-0.564995	-0.0162528	No								Nkg7	28181
Slc25a24	36058	-0.601743	-0.619443	Yes		Rad51	4763	0.976007	0.317935	Yes														Rab11fip4	38719	-1.58211	-0.219086	Yes								Pak2	35879	-0.57445	-0.010678	No								Carhsp1	28622
Hopx	36064	-0.60279	-0.6158	Yes		Chtf18	5077	0.925525	0.312104	No														Ppp3cc	38813	-1.69552	-0.200538	Yes								Anapc5	36875	-0.750543	-0.0265148	No								Rad21	28725
Dock5	36285	-0.637042	-0.617447	Yes		Lyar	5105	0.921784	0.313657	No														Ptpn4	38850	-1.75104	-0.179849	Yes								Ccnd2	37028	-0.789586	-0.0203126	No								Chst11	29262
Nsmaf	36484	-0.673879	-0.618299	Yes		Calr	5144	0.915626	0.31491	No														Ttc14	39008	-2.07942	-0.1582	Yes								Gas2	37681	-0.960577	-0.0247022	No								Bspry	29279
Gpr160	36639	-0.703696	-0.617839	Yes		Il6st	5293	0.897147	0.313274	No														Ypel1	39147	-2.74697	-0.127827	Yes								Sfn	37881	-1.03709	-0.0165394	No								Cxcr3	29394
Anxa2	36674	-0.710584	-0.614265	Yes		Map3k8	5347	0.891753	0.314081	No														Camk2b	39212	-4.48581	-0.0741044	Yes								Mdm2	38816	-1.69753	-0.0187209	No								Errfi1	29469
Casp7	36733	-0.724888	-0.611215	Yes		Cenpm	5361	0.890681	0.31592	No														Fasl	39220	-6.03392	0.000178893	Yes								Shc1	39062	-2.28572	0.00421629	No								Ccdc50	29596
Sytl2	36748	-0.727348	-0.607024	Yes		Brca1	5414	0.882298	0.316729	No																																						Lpin2	29799
Arhgap18	36749	-0.727463	-0.602473	Yes		Ifitm1	5611	0.855174	0.313751	No																																						Stk39	30031
Tbx21	36778	-0.73268	-0.598607	Yes		Kat2a	5627	0.852726	0.315445	No																																						Itga2	30227
Cobll1	36912	-0.760117	-0.597256	Yes		Hspa5	5863	0.822596	0.311379	No																																						S100a11	30355
Cmklr1	36970	-0.775605	-0.593863	Yes		E2f1	5964	0.811329	0.310775	No																																						Kcnk5	30382
Klrc3	36986	-0.779365	-0.589372	Yes		Oasl1	5997	0.806498	0.311917	No																																						Stmn1	30443
Ccnd2	37028	-0.789586	-0.585483	Yes		Nphp4	6006	0.805597	0.313676	No																																						Fam129a	30743
1700025G04Rik	37086	-0.805115	-0.581905	Yes		Hells	6043	0.802316	0.314704	No																																						Il2rb	30806
Ccl5	37274	-0.852762	-0.581358	Yes		Zfp367	6157	0.788037	0.313707	No																																						Osbpl3	30992
Car5b	37396	-0.883378	-0.578929	Yes		Huwe1	6165	0.787326	0.315448	No																																						Hip1r	31461
Pik3ap1	37418	-0.888346	-0.573909	Yes		Nr4a3	6400	0.761303	0.311259	No																																						Myadm	31497
Prdm1	37633	-0.947081	-0.573463	Yes		Eif3a	6624	0.737909	0.307296	No																																						Ccl5	31655
Ccr5	37652	-0.953706	-0.567958	Yes		Tmem106a	6796	0.720364	0.304635	No																																						Capg	31755
Dusp5	37666	-0.955932	-0.562311	Yes		Ranbp1	6897	0.711331	0.303787	No																																						Wee1	32002
Prex1	37707	-0.97256	-0.557251	Yes		Art2b	6919	0.708981	0.304975	No																																						Eomes	32068
Plek	37712	-0.974882	-0.551255	Yes		Fignl1	6970	0.703672	0.3054	No																																						Anxa1	32235
Rnf216	37753	-0.988346	-0.546097	Yes		Rnf213	7029	0.697291	0.305603	No																																						Klrk1	32645
Mapre2	37773	-0.999445	-0.540331	Yes		Mcm7	7047	0.695701	0.306862	No																																						Prr5	32847
Dapk2	37814	-1.0128	-0.53502	Yes		Riok1	7068	0.69383	0.308039	No																																						Slamf7	32996
Nkg7	37824	-1.0151	-0.5289	Yes		Rcc1	7088	0.691925	0.309237	No																																						Hmgb2	33109
Arsb	37859	-1.02852	-0.523337	Yes		Egr1	7173	0.682739	0.308732	No																																						Tigit	33354
Kif13b	37870	-1.0321	-0.517137	Yes		Tmprss6	7308	0.670449	0.306905	No																																						Klrc3	33849
Klrk1	37888	-1.03994	-0.511067	Yes		Pop1	7385	0.664243	0.306562	No																																						Plek	34070
Reep5	37927	-1.05455	-0.505443	Yes		Dctd	7481	0.655257	0.305707	No																																						Gem	34171
Atp2b4	37949	-1.06296	-0.499331	Yes		Anp32b	7546	0.649662	0.305638	No																																						Itgb1	34368
Soat2	37953	-1.06494	-0.492746	Yes		Cd69	7559	0.64841	0.306911	No																																						Whsc1	34653
Chsy1	37957	-1.06605	-0.486155	Yes		Ifih1	7570	0.647409	0.308233	No																																						Sytl2	34827
Carhsp1	38025	-1.0927	-0.481035	Yes		Lig1	7576	0.646793	0.309683	No																																						Adap1	34909
Ppm1j	38050	-1.10614	-0.47473	Yes		Trip13	7660	0.640235	0.3091	No																																						Casp3	35083
Gzma	38055	-1.10736	-0.467905	Yes		Slc41a1	7671	0.639387	0.310402	No																																						Fasl	35246
Osbpl3	38084	-1.12143	-0.461607	Yes		Cdc25a	7712	0.634715	0.310918	No																																						Ggh	35249
Capn2	38133	-1.145	-0.455673	Yes		Apex1	7848	0.621589	0.308946	No																																						Casp1	35386
Itgam	38158	-1.16123	-0.449024	Yes		Clpb	7914	0.615911	0.30877	No																																						Dennd4a	35464
Errfi1	38237	-1.19838	-0.443524	Yes		Sema7a	8015	0.607796	0.307669	No																																						Arhgap18	35538
Il18r1	38242	-1.20152	-0.43611	Yes		Snd1	8130	0.595558	0.306176	No																																						Mdfic	35597
Stard10	38282	-1.23034	-0.429412	Yes		Ahr	8140	0.594899	0.307395	No																																						Adora2a	35642
Kcnk5	38285	-1.23166	-0.421759	Yes		Eif2s2	8204	0.589124	0.307205	No																																						Dapk2	35771
Anxa1	38288	-1.23239	-0.414101	Yes		Wdr62	8234	0.587551	0.30789	No																																						Runx2	35815
Fam129b	38363	-1.28586	-0.407952	Yes		Pdia3	8404	0.574681	0.304925	No																																						Prdm1	35844
Zeb2	38424	-1.31904	-0.401237	Yes		Npm1	8485	0.567415	0.304242	No																																						Fbxl2	36096
Klf10	38439	-1.32827	-0.393286	Yes		Dgat1	8515	0.564984	0.304872	No																																						Stard10	36163
B4galt5	38536	-1.39133	-0.387041	Yes		P2ry14	8517	0.564952	0.306225	No																																						Nsmaf	36233
Unc119	38552	-1.41153	-0.378595	Yes		Eif4a1	8574	0.560476	0.306146	No																																						Prr13	36248
Raph1	38594	-1.44905	-0.37058	Yes		Pus7	8729	0.549031	0.303506	No																																						Bhlhe40	36310
Ak3	38764	-1.63379	-0.364686	Yes		Prp2	8794	0.545192	0.303182	No																																						Serpinb6b	36328
Gem	38774	-1.64693	-0.354614	Yes		Nfkbiz	8923	0.536598	0.301184	No																																						B4galt5	36589
Stx11	38796	-1.67662	-0.344664	Yes		Gins2	8925	0.536569	0.302468	No																																						Il18rap	36778
Il18rap	38835	-1.72285	-0.33486	Yes		Oasl2	9149	0.521768	0.297978	No																																						Gpr160	37078
Klrc2	38857	-1.76576	-0.324352	Yes		Pmf1	9169	0.520358	0.298757	No																																						Anxa2	37114
Lpin2	38871	-1.7891	-0.313493	Yes		Oas3	9186	0.519224	0.299611	No																																						Nrarp	37152
Runx2	38883	-1.8125	-0.302437	Yes		Dhx58	9292	0.511908	0.298147	No																																						1700025G04Rik	37621
Nbeal2	38891	-1.83456	-0.29114	Yes		Etv6	9365	0.508454	0.297527	No																																						Arsb	37660
Atf6	38931	-1.92848	-0.280075	Yes		Plk3	9411	0.505226	0.297597	No																																						Gzma	37754
Itga2	38953	-1.95496	-0.268384	Yes		Smc2	9436	0.503641	0.298206	No																																						Ptprj	37956
Pogk	38957	-1.95879	-0.256208	Yes		Ssrp1	9480	0.500449	0.298316	No																																						Id2	37983
Nrarp	38972	-2.00095	-0.24405	Yes		Myo19	9657	0.48896	0.294961	No																																						Ccr2	38287
Ttc39b	39015	-2.10191	-0.231977	Yes		Mcm6	9706	0.485991	0.294907	No																																						Tnfrsf1b	38362
Itga4	39036	-2.16978	-0.218916	Yes		Agpat1	9901	0.471832	0.291044	No																																						Il10ra	38366
Eomes	39097	-2.39612	-0.205463	Yes		Prim1	10042	0.461816	0.288553	No																																						Atf6	38392
Efhd2	39102	-2.41473	-0.190461	Yes		Socs1	10306	0.443755	0.282839	No																																						Klrc1	38645
Fbxl2	39140	-2.66792	-0.174719	Yes		Gns	10394	0.438741	0.281661	No																																						Ttc39c	38738
Tmem163	39170	-3.09573	-0.156097	Yes		Plk4	10414	0.43739	0.282238	No																																						Gnptab	38829
Smad3	39175	-3.18284	-0.136289	Yes		Mapk6	10455	0.43499	0.282266	No																																						Gzmb	38874
Stk32c	39188	-3.43109	-0.115134	Yes		Ints7	10475	0.433177	0.282832	No																																						Dusp5	38974
Nptn	39201	-3.80218	-0.0916572	Yes		Usp31	10577	0.427917	0.281266	No																																						Pik3ap1	39016
Gnptab	39206	-4.04774	-0.0664397	Yes		Ncl	10689	0.421964	0.279427	No																																						Ccr5	39097
Chst11	39213	-4.66509	-0.0374116	Yes		Hyou1	10743	0.417926	0.279077	No																																						Ctla2a	39187
Fasl	39220	-6.03392	0.000178865	Yes		Ern1	10753	0.417469	0.279864	No																																						Itgb3bp	39206
						Larp1	10807	0.413798	0.279504	No
						Cmpk2	10873	0.410186	0.278825	No
						Tnfaip3	10911	0.40785	0.278865	No
						Syvn1	10917	0.407636	0.279731	No
						Wee1	10937	0.406597	0.280232	No
						Chaf1a	10947	0.406008	0.28099	No
						Mcm5	10960	0.405531	0.28167	No
						Cxcl10	11054	0.400157	0.280243	No
						Dkc1	11097	0.397382	0.280128	No
						Ppp1r3b	11143	0.394644	0.279928	No
						Hif1a	11199	0.391277	0.279462	No
						Ipo7	11209	0.390666	0.280183	No
						Hic1	11253	0.38803	0.280019	No
						Bspry	11384	0.381262	0.277589	No
						Atad2	11491	0.375169	0.275765	No
						Mov10	11660	0.366091	0.272317	No
						Stat1	11664	0.365857	0.273132	No
						Rfc3	11930	0.352617	0.267144	No
						Tmem184b	12159	0.340577	0.262082	No
						Ksr1	12237	0.336178	0.260913	No
						Tuba1b	12467	0.325318	0.255788	No
						Ipo4	12497	0.323961	0.255829	No
						Il18bp	12549	0.321866	0.255297	No
						Eif5a	12804	0.310669	0.24949	No
						Ube2m	12809	0.310518	0.250145	No
						Tap1	12818	0.310148	0.250695	No
						Map2k7	12864	0.308155	0.250284	No
						Dennd4a	12969	0.303785	0.248338	No
						Zc3h4	13003	0.302205	0.248222	No
						Samhd1	13176	0.294827	0.244497	No
						Atr	13185	0.294473	0.245009	No
						Pabpc4	13211	0.293087	0.245078	No
						Sipa1l3	13307	0.289216	0.243328	No
						Socs3	13333	0.288438	0.243386	No
						Whsc1	13546	0.278732	0.238587	No
						Thada	13620	0.276497	0.237376	No
						Chd3	13646	0.275507	0.237402	No
						Tfrc	13694	0.273108	0.236854	No
						Mcm4	14060	0.257505	0.228048	No
						Xaf1	14061	0.257478	0.228677	No
						Pole2	14069	0.257238	0.229124	No
						Sult2b1	14088	0.256791	0.229286	No
						Psmd1	14141	0.255192	0.228565	No
						Pcna	14276	0.24966	0.225711	No
						Pml	14395	0.245659	0.22326	No
						Yrdc	14408	0.245211	0.223549	No
						Usp18	14471	0.243122	0.22254	No
						Nek6	14575	0.239637	0.220463	No
						Rtp4	14647	0.237297	0.219207	No
						Gm8587	14673	0.236304	0.219137	No
						Nlrc5	14695	0.235276	0.219169	No
						Nle1	14849	0.228602	0.215772	No
						Amigo3	14866	0.227852	0.215915	No
						Dhfr	14902	0.2266	0.215564	No
						Dnajb11	14935	0.225528	0.215287	No
						Wdhd1	15090	0.219928	0.211844	No
						Alms1	15210	0.214692	0.209292	No
						Nop58	15266	0.212377	0.208389	No
						Chek1	15472	0.205208	0.203591	No
						Mink1	15550	0.202559	0.202096	No
						Mybl2	15621	0.199835	0.200774	No
						Rrm1	15937	0.188661	0.193093	No
						Pitpnm2	15987	0.187552	0.192284	No
						Pla2g6	16062	0.185267	0.190824	No
						Mcph1	16178	0.180888	0.188293	No
						Parp9	16198	0.179846	0.188241	No
						Wars	16302	0.17623	0.186009	No
						Rcc2	16346	0.174646	0.185324	No
						Dot1l	16541	0.168277	0.180721	No
						Hsh2d	16751	0.16073	0.175711	No
						Gm5523	16818	0.157859	0.17439	No
						F2rl2	16861	0.156515	0.173687	No
						Gbp4	17001	0.152299	0.170466	No
						Pprc1	17011	0.151967	0.170604	No
						Ccl3	17230	0.146291	0.165327	No
						P4hb	17246	0.14579	0.165295	No
						Cd38	17255	0.145487	0.165444	No
						Irf7	17298	0.143983	0.16471	No
						Srcap	17361	0.14176	0.163453	No
						Taf4b	17488	0.137917	0.160533	No
						Gm5145	17543	0.135925	0.159469	No
						Ipo5	17546	0.135719	0.159749	No
						Nfkbib	17583	0.135006	0.159148	No
						Icam1	17654	0.132288	0.157662	No
						Eprs	17667	0.132038	0.157674	No
						Ubap2	17677	0.131586	0.157762	No
						Ezh2	17918	0.125167	0.151865	No
						Snhg1	17921	0.125121	0.152118	No
						Atxn2l	17960	0.12397	0.151439	No
						Gnaq	18184	0.118003	0.145963	No
						Psme1	18433	0.109683	0.139821	No
						Xdh	18608	0.104517	0.135579	No
						Cdkn1a	18703	0.101223	0.133396	No
						Mthfd2	18875	0.0971827	0.129214	No
						Mettl1	18901	0.0965718	0.128803	No
						Ankrd52	18936	0.095587	0.128158	No
						Slc35b1	18946	0.0952848	0.128158	No
						Fnbp4	18954	0.0950421	0.128209	No
						Ung	18982	0.0943968	0.127742	No
						Nkrf	19073	0.0920468	0.12564	No
						Znhit1	19147	0.0899443	0.123973	No
						Hsf1	19660	0.083477	0.110943	No
						Tomm40	19665	0.0834433	0.111044	No
						Trafd1	19666	0.0834247	0.111247	No
						Parp14	19940	0.0741993	0.104372	No
						A230050P20Rik	20054	0.0710044	0.101625	No
						Ticam1	20108	0.0696692	0.100425	No
						Plcg2	20121	0.0693504	0.100284	No
						E2f4	20125	0.0692609	0.100376	No
						Cdh24	20244	0.0663076	0.0974878	No
						Morc2a	20348	0.063635	0.094981	No
						Sipa1l1	20554	0.0584155	0.089825	No
						Cldnd2	20562	0.0582444	0.0897863	No
						Maz	20589	0.0576773	0.0892551	No
						Ifrd2	20777	0.0524572	0.0845498	No
						Ddx54	21068	0.0456648	0.0771658	No
						Gadd45g	21133	0.0442691	0.0756197	No
						Tk1	21146	0.0437937	0.0754165	No
						Actn4	21786	0.0398736	0.0589979	No
						Atp13a1	21793	0.0394863	0.0589392	No
						Elavl1	21796	0.0393558	0.0589836	No
						Rnaseh2b	21932	0.0348528	0.0555794	No
						Il12rb1	22280	0.0237032	0.0466685	No
						Jund	22366	0.0213047	0.0445236	No
						Ppp1r14b	22419	0.0194036	0.0432269	No
						Dis3	22421	0.0193443	0.0432483	No
						Usp37	22690	0.0127064	0.0363525	No
						Slc7a6	22793	0.0104246	0.0337416	No
						Uck2	22814	0.00997596	0.033249	No
						Smchd1	22869	0.00882274	0.0318748	No
						Tbkbp1	22929	0.00786163	0.0303691	No
						Dgkh	23076	0.0050884	0.0266079	No
						Got2	23139	0.00250492	0.0250116	No
						Cpsf7	25425	-0.00047921	-0.0340465	No
						Fbl	25492	-0.00293802	-0.0357452	No
						4930588K23Rik	25557	-0.00515361	-0.0373868	No
						Irf8	25587	-0.00599455	-0.0381217	No
						Mx1	25646	-0.00813856	-0.0396009	No
						Atp2a2	25652	-0.00849143	-0.0397094	No
						Cysltr2	25833	-0.0149183	-0.0443253	No
						Entpd1	25919	-0.0175305	-0.0464795	No
						Dazap1	25999	-0.0201168	-0.0484723	No
						Cherp	26011	-0.0205634	-0.0487064	No
						Cbx5	26081	-0.0224381	-0.050435	No
						Ccl4	26155	-0.0249569	-0.0522609	No
						Thop1	26168	-0.025318	-0.0525092	No
						Egr2	26180	-0.0258146	-0.0527305	No
						Wiz	26201	-0.026458	-0.0531829	No
						Bcl2	26440	-0.0325193	-0.059255	No
						Msmp	26822	-0.0341779	-0.069019	No
						Ehd4	26957	-0.0371304	-0.0723918	No
						Suv39h1	26985	-0.0380164	-0.0729969	No
						Gm5069	27095	-0.0406982	-0.0757148	No
						Nacc1	27106	-0.0412204	-0.0758726	No
						Med13l	27203	-0.04384	-0.0782469	No
						Gm10521	27225	-0.0444274	-0.0786812	No
						Tgfb1	27226	-0.0444285	-0.0785727	No
						Osm	27486	-0.0531423	-0.0851373	No
						Hnrnpl	27561	-0.0558093	-0.0869137	No
						Paxip1	27719	-0.0604895	-0.0908239	No
						Vac14	27890	-0.0663533	-0.0950558	No
						Ifng	27988	-0.0703501	-0.0973912	No
						Arid1a	28006	-0.0712078	-0.0976568	No
						Taf6	28292	-0.0744673	-0.104841	No
						Ap1s3	28314	-0.0753875	-0.1052	No
						Gm9034	28365	-0.0773089	-0.106304	No
						Tbrg4	28383	-0.0777605	-0.106553	No
						Cirh1a	28469	-0.080905	-0.108553	No
						Adar	28495	-0.0820421	-0.108999	No
						Eif4enif1	28516	-0.0830626	-0.109313	No
						Fen1	28531	-0.0837017	-0.10947	No
						Eif2ak2	28641	-0.0876072	-0.112074	No
						Sco1	28670	-0.0887706	-0.112581	No
						Srxn1	28732	-0.0910262	-0.113935	No
						Irgm1	28789	-0.0935787	-0.115154	No
						Foxk2	28813	-0.0943064	-0.115518	No
						Eftud2	28820	-0.0945559	-0.115443	No
						Casp3	28914	-0.0985412	-0.117606	No
						Atp11a	29006	-0.10268	-0.119707	No
						Cblb	29026	-0.103629	-0.119945	No
						Sf1	29324	-0.11326	-0.127345	No
						Stat2	29474	-0.119114	-0.130905	No
						Pvr	29592	-0.123003	-0.133629	No
						Noc4l	29693	-0.126289	-0.135906	No
						Gsk3a	29696	-0.126353	-0.135649	No
						Abcb1a	29713	-0.127084	-0.135752	No
						Ppp1r16b	29766	-0.129032	-0.136781	No
						D17Wsu92e	29774	-0.129238	-0.136647	No
						Gnb5	29777	-0.129271	-0.136383	No
						Otud4	29803	-0.130241	-0.136711	No
						Gfpt1	29968	-0.136498	-0.140617	No
						Baz1a	30052	-0.140148	-0.14242	No
						Txn2	30173	-0.144956	-0.145168	No
						Zbp1	30323	-0.152332	-0.148647	No
						Alg8	30344	-0.153335	-0.148789	No
						Muc1	30451	-0.158264	-0.151143	No
						4930579G18Rik	30504	-0.160874	-0.152094	No
						Coro2a	30537	-0.162217	-0.152525	No
						Sh3bp2	30625	-0.166039	-0.154369	No
						Mthfd1l	30639	-0.166805	-0.154297	No
						Rrbp1	30663	-0.167987	-0.154482	No
						Bak1	30743	-0.171878	-0.156104	No
						Rrp1b	30916	-0.179569	-0.160111	No
						Cct2	31044	-0.185721	-0.16294	No
						Nup107	31068	-0.186506	-0.16308	No
						Setbp1	31069	-0.186516	-0.162624	No
						Glcci1	31082	-0.18676	-0.162479	No
						Rbl1	31087	-0.187046	-0.162125	No
						Slc35f2	31089	-0.187134	-0.161694	No
						2410002F23Rik	31141	-0.189712	-0.16255	No
						Sbno2	31146	-0.189961	-0.162189	No
						Ubap2l	31192	-0.191502	-0.162885	No
						Dcakd	31227	-0.192982	-0.163293	No
						Syncrip	31273	-0.195336	-0.163979	No
						Hsd3b7	31305	-0.196991	-0.164299	No
						Kpnb1	31307	-0.197124	-0.163844	No
						Tagln2	31362	-0.19996	-0.164751	No
						Notch1	31397	-0.201972	-0.165137	No
						Lmf2	31767	-0.22179	-0.174133	No
						Abcb1b	31892	-0.228711	-0.17678	No
						Plod2	32028	-0.236758	-0.179691	No
						Gsta3	32058	-0.23846	-0.179859	No
						Trp53	32078	-0.239516	-0.179765	No
						Ssr1	32236	-0.248173	-0.183217	No
						Tcof1	32248	-0.248989	-0.182894	No
						Csrnp1	32263	-0.24972	-0.182646	No
						Lrrc4	32377	-0.256095	-0.184941	No
						Ankrd28	32442	-0.259583	-0.185962	No
						Wnk1	32698	-0.275053	-0.191881	No
						Ahdc1	32810	-0.282995	-0.194059	No
						Wdr43	32980	-0.295397	-0.197706	No
						Gdf11	33105	-0.303034	-0.200172	No
						Srrm1	33143	-0.305394	-0.200382	No
						Dennd4b	33144	-0.305403	-0.199637	No
						Fosl2	33172	-0.307394	-0.199584	No
						Rnf126	33227	-0.31114	-0.200221	No
						Patl1	33241	-0.312133	-0.199795	No
						Nup205	33383	-0.323028	-0.20265	No
						Gm12250	33428	-0.326649	-0.20299	No
						Treml2	33562	-0.336491	-0.205606	No
						Runx1	33629	-0.341078	-0.20648	No
						Trak1	33695	-0.345539	-0.207316	No
						Tnks1bp1	33772	-0.351629	-0.208422	No
						Ddx18	33776	-0.351874	-0.207641	No
						Dek	33782	-0.352435	-0.20691	No
						Eif3b	33791	-0.353616	-0.206253	No
						Nolc1	33802	-0.354435	-0.205647	No
						Mxd1	33811	-0.355378	-0.204986	No
						Map2k4	33843	-0.357716	-0.204914	No
						Gm10537	33863	-0.359512	-0.204527	No
						Rexo1	33865	-0.359742	-0.203675	No
						Xpot	33971	-0.367679	-0.205491	No
						Nr4a2	34011	-0.37016	-0.205596	No
						2610318N02Rik	34131	-0.379354	-0.207745	No
						Arf6	34157	-0.381796	-0.20746	No
						Pcgf2	34199	-0.386109	-0.207577	No
						4930412M03Rik	34267	-0.392449	-0.208351	No
						Nf1	34313	-0.396761	-0.208545	No
						Luzp1	34342	-0.399245	-0.208294	No
						Slamf7	34430	-0.406499	-0.209551	No
						9330175E14Rik	34464	-0.410369	-0.209402	No
						Pkmyt1	34488	-0.412798	-0.208989	No
						Tuba1c	34618	-0.426098	-0.211283	No
						Chd7	34619	-0.426391	-0.210242	No
						Chaf1b	34641	-0.429274	-0.209737	No
						Bysl	34713	-0.43511	-0.21051	No
						Myd88	34734	-0.438263	-0.209957	No
						Slc25a22	34827	-0.447652	-0.211242	No
						Atn1	34839	-0.448552	-0.210431	No
						Sos1	35011	-0.466052	-0.213713	No
						Usp25	35053	-0.469767	-0.213626	No
						Bhlhe40	35115	-0.476599	-0.214039	No
						Irf1	35208	-0.486685	-0.215229	No
						Picalm	35214	-0.487695	-0.214168	No
						Hectd1	35221	-0.488513	-0.213131	No
						Slc1a5	35273	-0.493955	-0.213243	No
						Ccne1	35333	-0.502849	-0.21354	No
						Zfp335	35433	-0.51492	-0.214842	No
						Gm12070	35540	-0.527286	-0.216295	No
						R3hdm1	35554	-0.529477	-0.215338	No
						4932442E05Rik	35558	-0.530062	-0.214122	No
						Stat3	35609	-0.538524	-0.2141	No
						Aldh18a1	35642	-0.541756	-0.213604	No
						Mtbp	35749	-0.557255	-0.214984	No
						Ttll4	35804	-0.56421	-0.215002	No
						Ccnd3	35809	-0.564995	-0.213726	No
						Vps37b	35813	-0.56542	-0.212424	No
						Tcerg1	35908	-0.577848	-0.213443	No
						Nup98	35920	-0.580301	-0.21231	No
						Senp1	36007	-0.593526	-0.213084	No
						Zcchc2	36039	-0.599221	-0.212423	No
						Serpinb9	36062	-0.602393	-0.211521	No
						Igf2r	36181	-0.619781	-0.213058	No
						Etnk1	36227	-0.627738	-0.212689	No
						H2-T24	36243	-0.629611	-0.211539	No
						Spred2	36325	-0.643165	-0.212063	No
						Cars	36331	-0.644011	-0.21062	No
						Airn	36353	-0.647423	-0.209582	No
						Ms4a6b	36366	-0.648638	-0.208309	No
						Srf	36470	-0.669913	-0.209336	No
						Il12rb2	36504	-0.678043	-0.208534	No
						Shmt1	36658	-0.7076	-0.210761	No
						Topbp1	36678	-0.711409	-0.209516	No
						Arl5a	36746	-0.727162	-0.209472	No
						Tbx21	36778	-0.73268	-0.208485	No
						Sf3a2	36890	-0.75514	-0.209511	No
						Pds5a	37001	-0.782937	-0.210442	No
						Purb	37010	-0.784712	-0.208734	No
						Pou5f2	37155	-0.821454	-0.21045	No
						St6galnac4	37176	-0.827776	-0.208947	No
						Coro1c	37196	-0.832866	-0.207405	No
						Vasp	37227	-0.839586	-0.20613	No
						Zbtb32	37240	-0.842818	-0.204383	No
						Aars	37263	-0.849375	-0.202878	No
						Gpr171	37298	-0.858142	-0.201662	No
						Gspt1	37353	-0.870008	-0.200934	No
						Gm6981	37376	-0.875839	-0.199365	No
						Zcchc7	37390	-0.881707	-0.197549	No
						Car5b	37396	-0.883378	-0.195522	No
						Atf7	37416	-0.887321	-0.193847	No
						Pik3ap1	37418	-0.888346	-0.191704	No
						Larp4	37623	-0.945706	-0.194668	No
						Ccr5	37652	-0.953706	-0.193064	No
						Dusp5	37666	-0.955932	-0.191066	No
						F2r	37682	-0.961245	-0.189107	No
						Agfg1	37700	-0.968401	-0.187183	No
						Slfn8	37706	-0.972432	-0.184938	No
						Gpd2	37723	-0.980313	-0.182959	No
						Med15	37738	-0.98549	-0.180915	No
						Gm614	37766	-0.996381	-0.179181	No
						Dnajc13	37770	-0.998246	-0.176821	No
						Fam120a	37776	-1.00113	-0.174507	No
						Pim1	37816	-1.01311	-0.173042	No
						Tmem2	37860	-1.02867	-0.171642	No
						Zfp384	37861	-1.02933	-0.169129	No
						Cyfip2	37867	-1.03109	-0.166742	No
						Atp2b4	37949	-1.06296	-0.16624	No
						Chsy1	37957	-1.06605	-0.163819	No
						Slc16a6	38001	-1.08119	-0.162291	No
						Iars	38007	-1.08508	-0.159772	No
						Tle3	38073	-1.11768	-0.158723	No
						5930422O12Rik	38089	-1.124	-0.156367	No
						Banf1	38121	-1.14064	-0.154384	No
						Psme3	38145	-1.15112	-0.152169	No
						Elmo2	38197	-1.17659	-0.150615	No
						Stk40	38222	-1.19009	-0.14833	No
						Errfi1	38237	-1.19838	-0.145766	No
						Mllt6	38255	-1.20802	-0.143257	No
						Nfil3	38286	-1.23171	-0.141025	No
						Amfr	38298	-1.23861	-0.138286	No
						Ptpn2	38320	-1.25703	-0.13576	No
						Ptpre	38365	-1.28742	-0.133755	No
						Pom121	38370	-1.28944	-0.130711	No
						Ppm1h	38409	-1.31366	-0.128486	No
						Fubp1	38517	-1.37611	-0.127893	No
						Fam188a	38532	-1.38698	-0.124869	No
						B4galt5	38536	-1.39133	-0.12155	No
						Gm15470	38545	-1.40586	-0.118325	No
						Sulf2	38621	-1.47611	-0.11666	No
						Clic4	38653	-1.50391	-0.11379	No
						Midn	38661	-1.5156	-0.110271	No
						Atxn7l1	38681	-1.53778	-0.107009	No
						Abtb2	38722	-1.58417	-0.104175	No
						Smarca4	38723	-1.58541	-0.100305	No
						Gramd4	38730	-1.59138	-0.0965756	No
						Camta2	38743	-1.60534	-0.092967	No
						Ahctf1	38752	-1.62221	-0.0892138	No
						Trak2	38757	-1.62822	-0.0853426	No
						Carm1	38775	-1.6472	-0.081761	No
						Stx11	38796	-1.67662	-0.0781852	No
						Sec24c	38808	-1.68978	-0.0743446	No
						Atf6	38931	-1.92848	-0.0727903	No
						D8Ertd82e	38937	-1.93654	-0.0681922	No
						Lpp	39173	-3.16623	-0.0665371	No
						Serpinb9b	39174	-3.18039	-0.0587736	No
						Mctp2	39191	-3.52844	-0.0505739	No
						Ppp1r15b	39203	-3.91836	-0.0412932	No
						Ide	39227	-17.1595	1.1344e-07	No
[truncated: 38 more columns]
