# Supplementary material for: CD47 Expression in Natural Killer Cells Regulates Homeostasis and Modulates Immune Response to Lymphocytic Choriomeningitis Virus
Source: PubMed Central journal article supplement (PMC6320676; doi:10.3389/fimmu.2018.02985), 2018-12-20
Supplement: Table_3.pdf [file Table_3.pdf]

**table S3.** Primers used for qRT-PCR analysis of gene expression.

| Gene              | Forward primer                 | Reverse primer                 |
|-------------------|--------------------------------|--------------------------------|
| <i>beta-Actin</i> | 5'-ATGGAGGGGAATACAGCCC-3'      | 5'-TTCTTTGCAGCTCCTTCGTT-3'     |
| <i>Ahr</i>        | 5'- CTCCTTCTTGCAAATCCTGC-3'    | 5'- GGCCAAGAGCTTCTTTGATG-3'    |
| <i>Cd3e</i>       | 5'-TCGTCACTGTCTAGAGGGCA-3'     | 5'-CCTCCTAGCTGTTGGCACTT-3'     |
| <i>Cd3g</i>       | 5'- TGCCATCCACTTGTACCAAA-3'    | 5'- ACATGGAGCAGAGGAAGGGT-3'    |
| <i>Cish</i>       | 5'- CGACTACCTCCGACAGTACC-3'    | 5'-TGTGACAATCCCTCCTCCAC-3'     |
| <i>cMaf</i>       | 5'- AAATACGAGAAGCTGGTGAGCAA-3' | 5'-CGGGAGAGGAAGGGTTGTC-3'      |
| <i>Eomes</i>      | 5'-GACCTCCAGGGACAATCTGA-3'     | 5'-GGCCTACCAAAACACGGATA-3'     |
| <i>Foxp3</i>      | 5'- CTCGTCTGAAGGCAGAGTCA-3'    | 5'-TGGCAGAGAGGTATTGAGGG-3'     |
| <i>Gapdh</i>      | 5'-TGTGTCCGTCGTGGATCTGA-3'     | 5'-CCTGCTTACCACCTTCTTGAT-3'    |
| <i>Gata3</i>      | 5'-AGGATGTCCCTGCTCTCCTT-3'     | 5'-GCCTGCCGACTCTACCATAA-3'     |
| <i>Gzmb</i>       | 5'-CATGTAGGGTCGAGAGTGGG-3'     | 5'-CCTCCTGCTACTGCTGACCT-3'     |
| <i>Gzmc</i>       | 5'-CAGAGGAGATAATCGGAGGCA-3'    | 5'- ACGAATTTGTCTCGAACCAGG-3'   |
| <i>Id2</i>        | 5'- AGAAAAGAAAAGTCCCAAATG-3'   | 5'-GTCCTTGCAGGCATCTGAAT-3'     |
| <i>Ifng</i>       | 5'-TGAGCTCATTGAATGCTTGG-3'     | 5'-ACAGCAAGGCGAAAAAGGAT-3'     |
| <i>Il2rb</i>      | 5'-GACAGGCTCCAGGGAAGAG -3'     | 5'- CAGGACTGCAGGGAACATCT -3'   |
| <i>Klra5</i>      | 5'-GATAAAAATATACAACCTCCAGGC-3' | 5'- AGCAATGGGCATGGATTG-3'      |
| <i>Klrb1c</i>     | 5'-CACAGCTGCCATTTTCAGTG-3'     | 5'-AAGGTTACATTGCCAGACA-3'      |
| <i>Klrc1</i>      | 5'- CGAAGGATTCCAGTCCATGA-3'    | 5'-GGTGCCTGCATTTCCAAAA-3'      |
| <i>Mmp9</i>       | 5'- GCAGAGGCATACTTGTACCG-3'    | 5'- TGATGTTATGATGGTCCCACTTG-3' |
| <i>Ncr1</i>       | 5'-GGCTGCTGTTCTCAACACCT-3'     | 5'-GGCTCACAGAGGGACATACA-3'     |
| <i>Perforin1</i>  | 5'-TGGAGGTTTTTGTACCAGGC-3'     | 5'-TAGCCAATTTTGCAGCTGAG-3'     |

|               |                             |                               |
|---------------|-----------------------------|-------------------------------|
| <i>Rorc</i>   | 5'-TGAGGCCATTTCAGTATGTGG-3' | 5'-CTTCATTGCTCCTGCTTTC-3'     |
| <i>Stat3</i>  | 5'-CTGCTCCAGGTAGCGTGTGT-3'  | 5'-CTCAGCCCCGGAGACAGT-3'      |
| <i>Stat4</i>  | 5'-TTGAAGCAGAATTGTTGCCA-3'  | 5'-CTTCCCTATGGAAATCCGGC-3'    |
| <i>Stat6</i>  | 5'-CTGGGGTGGTTTCCTCTTG-3'   | 5'-TGCCCGGTCTCACCTAACTA-3'    |
| <i>Tbx21</i>  | 5'-GCCAGGGAACCGCTTATATG-3'  | 5'-GACGATCATCTGGGTCACATTGT-3' |
| <i>Tcf7</i>   | 5'-GTGGACTGCTGAAATGTTTCG-3' | 5'-AGCATCCGCAGCCTCAAC-3'      |
| <i>Tfn</i>    | 5'-AGGGTCTGGGCCATAGAACT-3'  | 5'-CCACCAGCTCTTCTGTCTAC-3'    |
| <i>Tox</i>    | 5'-ACATGTTCTCCCCGTCAAAC-3'  | 5'-ATTTTATCCTCCTCCAGCCC-3'    |
| <i>Zbtb16</i> | 5'-CCCAGTTCTCAAAGGAGGATG-3' | 5'-TTCCCACACAGCAGACAGAAG-3'   |
